# Supplementary material for: Protein conformational alterations induced by the retinal excited state in proton and sodium pumping rhodopsins
Source: Royal Society of Chemistry journal article supplement (doi:10.1039/c9cp00681h), 2019-01-01
Supplement: c9cp00681h1.pdf [file c9cp00681h1.pdf]

## Supplementary Material

### Protein conformational alterations induced by retinal excited state in proton and sodium pumping rhodopsins

Mihir Ghosh,<sup>a</sup> Kwang-Hwan Jung,<sup>b</sup> Mordechai Sheves<sup>\*a</sup>

<sup>a</sup> Department of Organic Chemistry, Weizmann Institute of Science, Rehovot, Israel

<sup>b</sup> Department of Life Science and Institute of Biological Interfaces, Sogang University, Sogang, South Korea

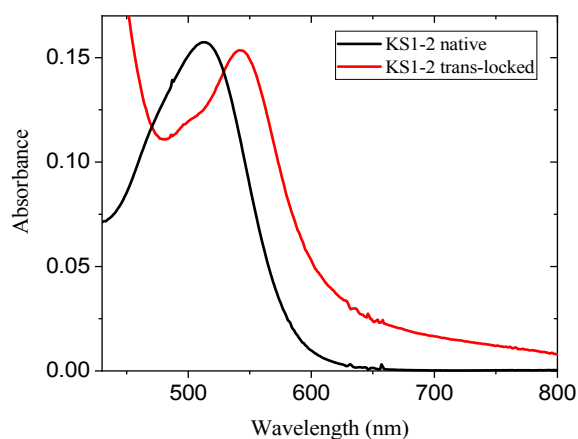

Fig. S1. The absorption maxima of the native and an artificially locked pigment of KS1-2.

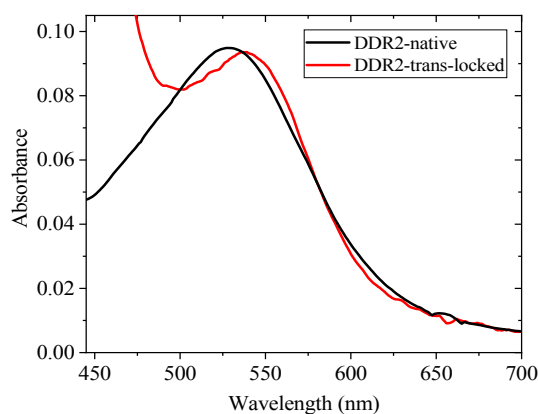

Fig. S2. The absorption maxima of the native and an artificially locked pigment of DDR2.

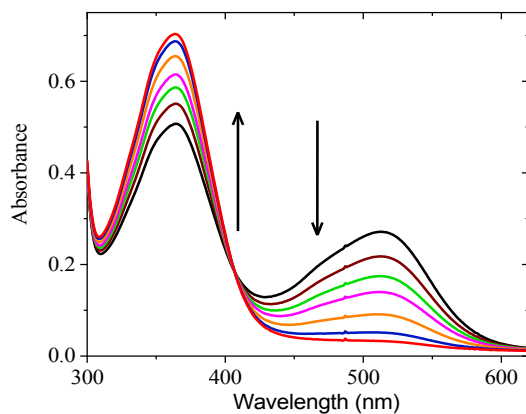

Fig. S3. The absorption spectra of the hydroxylamine reaction with the KS1-2 pigment at different time intervals.

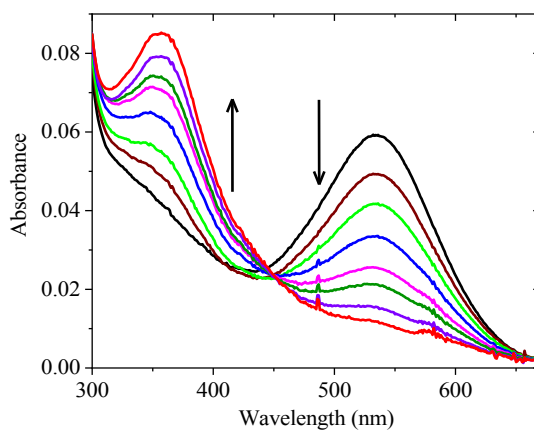

Fig. S4. The absorption spectra of the hydroxylamine reaction with the DDR2 pigment at different intervals.

Table S1: Rate constant (k) values of the hydroxylamine reaction kinetics of native and artificial KS1-2 and DDR2 pigments at different temperatures.

| KS1-2             | Light                  | Dark                   | KS1-2- <i>trans</i><br>-locked | Light                  | Dark                   |
|-------------------|------------------------|------------------------|--------------------------------|------------------------|------------------------|
|                   | k (s <sup>-1</sup> )   | k (s <sup>-1</sup> )   |                                | k (s <sup>-1</sup> )   | k (s <sup>-1</sup> )   |
| 15 <sup>o</sup> C | 6.35 ×10 <sup>-3</sup> | 8.26 ×10 <sup>-4</sup> | 15 <sup>o</sup> C              | 1.15 ×10 <sup>-3</sup> | 5.76 ×10 <sup>-5</sup> |
| 20 <sup>o</sup> C | 9.03 ×10 <sup>-3</sup> | 1.22 ×10 <sup>-3</sup> | 20 <sup>o</sup> C              | 1.91 ×10 <sup>-3</sup> | 8.74 ×10 <sup>-5</sup> |
| 25 <sup>o</sup> C | 9.25 ×10 <sup>-3</sup> | 1.84 ×10 <sup>-3</sup> | 25 <sup>o</sup> C              | 2.44 ×10 <sup>-3</sup> | 1.44 ×10 <sup>-4</sup> |
| 30 <sup>o</sup> C | 1.35 ×10 <sup>-2</sup> | 2.82 ×10 <sup>-3</sup> | 30 <sup>o</sup> C              | 3.01 ×10 <sup>-3</sup> | 2.49 ×10 <sup>-4</sup> |
| 35 <sup>o</sup> C | 1.82 ×10 <sup>-2</sup> | 3.67 ×10 <sup>-3</sup> | 35 <sup>o</sup> C              | 3.44 ×10 <sup>-3</sup> | 4.16 ×10 <sup>-4</sup> |
| 40 <sup>o</sup> C | 1.98 ×10 <sup>-2</sup> | 5.38 ×10 <sup>-3</sup> | 40 <sup>o</sup> C              | 5.04 ×10 <sup>-3</sup> | 6.46 ×10 <sup>-4</sup> |
| 45 <sup>o</sup> C | 2.61 ×10 <sup>-2</sup> | 7.04 ×10 <sup>-3</sup> | 45 <sup>o</sup> C              | 5.07 ×10 <sup>-3</sup> | 1.03 ×10 <sup>-3</sup> |
| DDR2              |                        |                        | DDR2- <i>trans</i><br>-locked  |                        |                        |
| 15 <sup>o</sup> C | 3.11 ×10 <sup>-3</sup> | -                      | 15 <sup>o</sup> C              | -                      | -                      |
| 20 <sup>o</sup> C | 3.48 ×10 <sup>-3</sup> | 2.21 ×10 <sup>-5</sup> | 20 <sup>o</sup> C              | -                      | -                      |
| 25 <sup>o</sup> C | 4.56 ×10 <sup>-3</sup> | 2.85 ×10 <sup>-5</sup> | 25 <sup>o</sup> C              | 5.28 ×10 <sup>-4</sup> | 1.31 ×10 <sup>-6</sup> |
| 30 <sup>o</sup> C | 4.85 ×10 <sup>-3</sup> | 6.70 ×10 <sup>-5</sup> | 30 <sup>o</sup> C              | 7.37 ×10 <sup>-4</sup> | 3.71 ×10 <sup>-6</sup> |
| 35 <sup>o</sup> C | 5.29 ×10 <sup>-3</sup> | 2.56 ×10 <sup>-4</sup> | 35 <sup>o</sup> C              | 7.88 ×10 <sup>-4</sup> | 2.55 ×10 <sup>-5</sup> |
| 40 <sup>o</sup> C | 6.05 ×10 <sup>-3</sup> | 5.79 ×10 <sup>-4</sup> | 40 <sup>o</sup> C              | 8.58 ×10 <sup>-4</sup> | 6.62 ×10 <sup>-5</sup> |
| 45 <sup>o</sup> C | 6.18 ×10 <sup>-3</sup> | 9.24 ×10 <sup>-4</sup> | 45 <sup>o</sup> C              | 1.61 ×10 <sup>-3</sup> | 1.38 ×10 <sup>-4</sup> |
| 50 <sup>o</sup> C | 6.59 ×10 <sup>-3</sup> | 1.97 ×10 <sup>-3</sup> | 50 <sup>o</sup> C              | 3.14×10 <sup>-3</sup>  | 3.81 ×10 <sup>-4</sup> |
